# Supplementary material
Source: MDPI journal article supplement (https://www.mdpi.com/2072-4292/14/21/5540)
Supplement: s1 [file s1]

## Supplementary Materials

**Table S1.** The URL of the datas.

| Name           | URL                                                                                                                                                                                 |
|----------------|-------------------------------------------------------------------------------------------------------------------------------------------------------------------------------------|
| GDP            | <a href="https://www.resdc.cn/DOI/DOI.aspx?DOIID=33">https://www.resdc.cn/DOI/DOI.aspx?DOIID=33</a>                                                                                 |
| NPP-VIIRS-like | <a href="https://dataverse.harvard.edu/dataset.xhtml?persistentId=doi:10.7910/DVN/YGIVCD">https://dataverse.harvard.edu/dataset.xhtml?persistentId=doi:10.7910/DVN/YGIVCD</a>       |
| Landsat5       | <a href="https://developers.google.com/earth-engine/datasets/catalog/LANDSAT_LT05_C02_T1_L2">https://developers.google.com/earth-engine/datasets/catalog/LANDSAT_LT05_C02_T1_L2</a> |
| Landsat8       | <a href="https://developers.google.com/earth-engine/datasets/catalog/LANDSAT_LC08_C02_T1_L2">https://developers.google.com/earth-engine/datasets/catalog/LANDSAT_LC08_C02_T1_L2</a> |
| WorldPop       | <a href="https://developers.google.com/earth-engine/datasets/catalog/WorldPop_GP_100m_pop">https://developers.google.com/earth-engine/datasets/catalog/WorldPop_GP_100m_pop</a>     |
| CHIRPS         | <a href="https://developers.google.com/earth-engine/datasets/catalog/UCSB-CHG_CHIRPS_PENTAD">https://developers.google.com/earth-engine/datasets/catalog/UCSB-CHG_CHIRPS_PENTAD</a> |
| ERA5-LAND      | <a href="https://developers.google.com/earth-engine/datasets/catalog/ECMWF_ERA5_LAND_HOURLY">https://developers.google.com/earth-engine/datasets/catalog/ECMWF_ERA5_LAND_HOURLY</a> |
| NASADEM        | <a href="https://developers.google.com/earth-engine/datasets/catalog/NASA_NASADEM_HGT_001">https://developers.google.com/earth-engine/datasets/catalog/NASA_NASADEM_HGT_001</a>     |
| MOD17A3HGF V6  | <a href="https://developers.google.com/earth-engine/datasets/catalog/MODIS_006_MOD17A3HGF">https://developers.google.com/earth-engine/datasets/catalog/MODIS_006_MOD17A3HGF</a>     |

**Table S2.** Abbreviations.

| Abbreviation | Full Name                                                      | Position of First Appearance |
|--------------|----------------------------------------------------------------|------------------------------|
| RF           | Random forest                                                  | Line17                       |
| GEE          | Google Earth Engine                                            | Line98                       |
| GDP          | Gross domestic product                                         | Line139                      |
| NDVI         | Normalized vegetation index                                    | Line143                      |
| CHIRPS       | Climate Hazards Group InfraRed Precipitation With Station Data | Line146                      |
| NASA         | National Aeronautics and Space Administration                  | Line149                      |
| SRTM         | Shuttle Radar Topography Mission                               | Line149                      |
| RGB          | Red, green and blue                                            | Line182                      |
| NIR          | Near infrared                                                  | Line182                      |
| SWIR         | Short wave infrared                                            | Line182                      |
| EVI          | Enhanced vegetation index                                      | Line186                      |
| LSWI         | Surface water index                                            | Line187                      |
| MNDWI        | Normalized differential water index                            | Line188                      |
| MIR          | Mid-infrared                                                   | Line189                      |
| CA           | Cellular automata                                              | Line196                      |
| FOM          | Figure of merit                                                | Line204                      |
| ANN          | Artificial Neural Network                                      | Line209                      |
| NPP          | Net primary productivity                                       | Line293                      |
